# Supplementary material for: Puupehenone, a Marine-Sponge-Derived Sesquiterpene Quinone, Potentiates the Antifungal Drug Caspofungin by Disrupting Hsp90 Activity and the Cell Wall Integrity Pathway
Source: PubMed Central journal article supplement (PMC6952202; doi:10.1128/msphere.00818-19), 2020-01-08
Supplement: mSphere.00818-19-sf001.pdf [file mSphere.00818-19-sf001.pdf]

**A**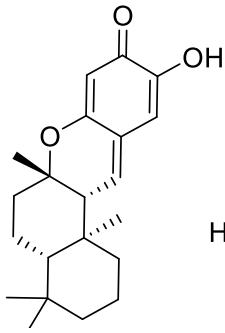

Puupehenone

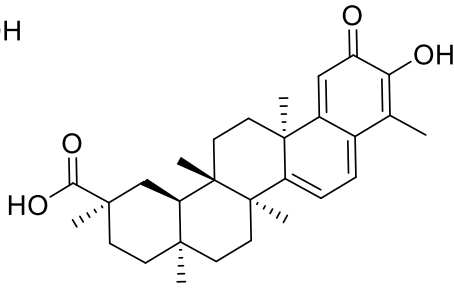

Celastrol

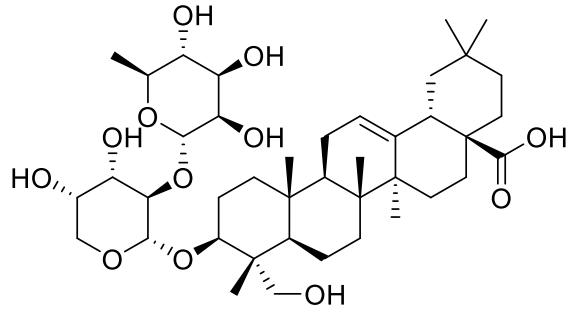

Sapindoside A

**B**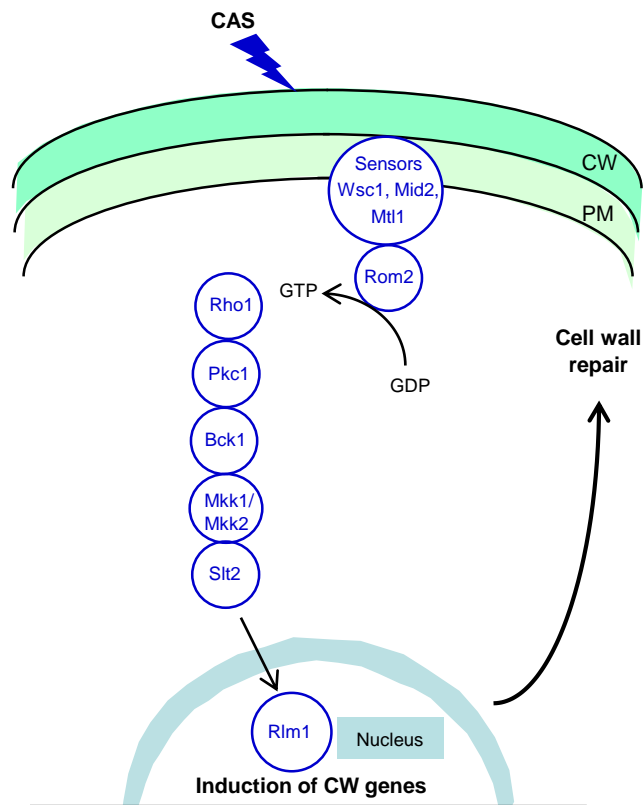**Figure S1**
