# Supplementary material for: Puupehenone, a Marine-Sponge-Derived Sesquiterpene Quinone, Potentiates the Antifungal Drug Caspofungin by Disrupting Hsp90 Activity and the Cell Wall Integrity Pathway
Source: PubMed Central journal article supplement (PMC6952202; doi:10.1128/msphere.00818-19), 2020-01-08
Supplement: mSphere.00818-19-st001.pdf [file mSphere.00818-19-st001.pdf]

**Supplemental Table S1. Fractional Inhibitory Concentration Index Values for Dose-Matrix Assays**

| Organism                                       | IC <sub>50</sub> of CAS <sup>a</sup> | IC <sub>50</sub> of CAS with PUUP | IC <sub>50</sub> of PUUP | IC <sub>50</sub> of PUUP with CAS | FICI <sup>b</sup> |
|------------------------------------------------|--------------------------------------|-----------------------------------|--------------------------|-----------------------------------|-------------------|
| <i>Cryptococcus neoformans</i><br>(strain H99) | 30 <sup>c</sup>                      | 1.5                               | 0.6                      | 0.2                               | 0.38              |
| <i>Candida glabrata</i><br>(strain 102)        | 17                                   | 2                                 | 0.72                     | 0.26                              | 0.48              |
| <i>Candida albicans</i><br>(strain DPL1010)    | 20                                   | 6                                 | 3.8                      | 0.35                              | 0.39              |

<sup>a</sup>IC<sub>50</sub> values are based on dose response curves.

<sup>b</sup>FICI = [A\*]/[A] + [B\*]/[B], where [A\*] is IC<sub>50</sub> of compound A in the presence of compound B, [A] is IC<sub>50</sub> of compound A alone, [B\*] is IC<sub>50</sub> of compound B in the presence of compound A, and [B] is IC<sub>50</sub> of compound B alone.

<sup>c</sup>All values are in µg/ml.
