# Supplementary material for: Puupehenone, a Marine-Sponge-Derived Sesquiterpene Quinone, Potentiates the Antifungal Drug Caspofungin by Disrupting Hsp90 Activity and the Cell Wall Integrity Pathway
Source: PubMed Central journal article supplement (PMC6952202; doi:10.1128/msphere.00818-19), 2020-01-08
Supplement: mSphere.00818-19-st003.pdf [file mSphere.00818-19-st003.pdf]

**Supplemental Table S3. Strains and Plasmids Used in this Study**

| Strain/Plasmid        | Description                                                                                                                                                                      | Source                                          |
|-----------------------|----------------------------------------------------------------------------------------------------------------------------------------------------------------------------------|-------------------------------------------------|
| <u>Strains</u>        |                                                                                                                                                                                  |                                                 |
| S288C                 | <i>MAT<math>\alpha</math></i> , <i>SUC2</i> , <i>mal</i> , <i>mel</i> , <i>gal2</i> , <i>CUP1</i> , <i>flo1</i> , <i>flo8-1</i>                                                  | ATCC                                            |
| BY4742                | <i>MAT<math>\alpha</math></i> , <i>his3<math>\Delta</math>1</i> , <i>leu2<math>\Delta</math>0</i> , <i>lys2<math>\Delta</math>0</i> , <i>ura3<math>\Delta</math>0</i>            | Open Biosystems, AL                             |
| STSc042               | BY4742 containing plasmid p1368                                                                                                                                                  | This study                                      |
| STSc035               | BY4742 containing plasmid HSE- <i>lacZ</i>                                                                                                                                       | This study                                      |
| STSc036               | BY4742 containing plasmid HSEm- <i>lacZ</i>                                                                                                                                      | This study                                      |
| STSc033               | BY4742 containing plasmids p413GPD-rGR and pYRP-GRE- <i>lacZ</i>                                                                                                                 | This study                                      |
| STSc038               | BY4742 containing plasmids pHCA-N525 and pYRP-GRE- <i>lacZ</i>                                                                                                                   | This study                                      |
| QFSc058               | BY4742 containing plasmid QFec058                                                                                                                                                | This study                                      |
| QFSc059               | BY4742 containing plasmid QFec059                                                                                                                                                | This study                                      |
| QFSc060               | BY4742 containing plasmid QFec060                                                                                                                                                | This study                                      |
| QFSc061               | BY4742 containing plasmid QFec061                                                                                                                                                | This study                                      |
| STSc063               | W303-1A containing plasmid pAM366                                                                                                                                                | Xu et al., 2011, AAC, 55: 1611                  |
| DL102                 | <i>MAT<math>\alpha</math></i> , <i>his4</i> <sup>-</sup> , <i>leu2-3,112</i> <sup>-</sup> , <i>trp1-1</i> <sup>-</sup> , <i>ura3-52</i> <sup>-</sup> , <i>can1R</i> <sup>-</sup> | David Levin, Boston Univ.                       |
| DL102, pMKK1-WT       | DL102 containing a plasmid expressing the WT version of <i>MKK1</i>                                                                                                              | David Levin, Boston Univ.                       |
| DL102, pMKK1-S386P    | DL102 containing a plasmid expressing a mutant version of <i>MKK1</i> with S386P mutation                                                                                        | David Levin, Boston Univ.                       |
| CnH99                 | <i>Cryptococcus neoformans</i> (strain H99)                                                                                                                                      | ATCC                                            |
| Cg102                 | <i>Candida glabrata</i> (clinical isolate number 102 with <i>FKS2</i> F659del mutation)                                                                                          | Ryan Shields, U. of Pittsburgh                  |
| CaDPL1009             | <i>Candida albicans</i> (clinical isolate number 1009 with <i>FKS1</i> S645Y mutation)                                                                                           | David Perlin, Rutgers Univ.                     |
| CaDPL1010             | <i>Candida albicans</i> (clinical isolate number 1010 with <i>FKS1</i> S645F mutation)                                                                                           | David Perlin, Rutgers Univ.                     |
| <u>Plasmids</u>       |                                                                                                                                                                                  |                                                 |
| p1368                 | <i>MLP1</i> promoter fused to <i>lacZ</i>                                                                                                                                        | David Levin, Boston Univ.                       |
| HSE- <i>lacZ</i>      | SSA3 promoter fused to <i>lacZ</i>                                                                                                                                               | Kevin Morano, UT Houston                        |
| HSEm- <i>lacZ</i>     | SSA3 promoter mutated at -156 fused to <i>lacZ</i>                                                                                                                               | Kevin Morano, UT Houston                        |
| p413GPD-rGR           | Glyceraldehyde-3-phosphate dehydrogenase promoter fused to glucocorticoid receptor (GR)                                                                                          | Kevin Morano, UT Houston                        |
| pYRP-GRE- <i>lacZ</i> | Glucocorticoid receptor element fused to <i>lacZ</i>                                                                                                                             | Kevin Morano, UT Houston                        |
| pHCA-N525             | Plasmid expressing truncated glucocorticoid receptor (up to N525)                                                                                                                | Kevin Morano, UT Houston                        |
| pAMS366               | 4X-CDRE fused to <i>lacZ</i>                                                                                                                                                     | Stathopoulos et al., 1997, Genes Dev., 11: 3432 |
| QFec058               | pRS426 plasmid containing <i>S. cerevisiae</i> <i>CDC37</i> (1000 bp 5' + ORF + 300 bp 3')                                                                                       | This study                                      |
| QFec059               | pRS426 plasmid containing <i>S. cerevisiae</i> <i>HSC82</i> (1000 bp 5' + ORF + 300 bp 3')                                                                                       | This study                                      |
| QFec060               | pRS426 plasmid containing <i>S. cerevisiae</i> <i>HSP82</i> (1000 bp 5' + ORF + 300 bp 3')                                                                                       | This study                                      |
| QFec061               | pRS426 plasmid containing <i>S. cerevisiae</i> <i>SLT2</i> (1000 bp 5' + ORF + 300 bp 3')                                                                                        | This study                                      |
