# Supplementary material for: Puupehenone, a Marine-Sponge-Derived Sesquiterpene Quinone, Potentiates the Antifungal Drug Caspofungin by Disrupting Hsp90 Activity and the Cell Wall Integrity Pathway
Source: PubMed Central journal article supplement (PMC6952202; doi:10.1128/msphere.00818-19), 2020-01-08
Supplement: mSphere.00818-19-st004.pdf [file mSphere.00818-19-st004.pdf]

**Supplemental Table S4. List of Primers Used in this Study**

| Gene  | Primer Name  | Primer Sequence                                             | Amplicon Size (bp) |
|-------|--------------|-------------------------------------------------------------|--------------------|
| CDC37 | CDC37-INF-F1 | 5'- <u>CGGTATCGATAAGCTT</u> TCGCAGAAAACATGAAGAAGAAGC-3'     | 2961               |
|       | CDC37-INF-R1 | 5'- <u>TAGAACTAGTGGATCC</u> AGCGTAGCAAGTTCTACTAATGGCG-3'    |                    |
| HSC82 | HSC82-INF-F1 | 5'- <u>CGGTATCGATAAGCTT</u> ACTTACAACGCTATGTGAATTAGAGC-3'   | 3267               |
|       | HSC82-INF-R1 | 5'- <u>TAGAACTAGTGGATCC</u> CTAAACTTTAAGGACAGCTGGTAGGA-3'   |                    |
| HSP82 | HSP82-INF-F1 | 5'- <u>CGGTATCGATAAGCTT</u> CTTTCAGAGAATCCAAATCGCCAG-3'     | 3435               |
|       | HSP82-INF-R1 | 5'- <u>TAGAACTAGTGGATCC</u> GAGTTCTCGTTCGAGCTCTACAC -3'     |                    |
| SLT2  | SLT2-INF-F1  | 5'- <u>CGGTATCGATAAGCTT</u> GTCATGGACATGAGATTAGTGAGTCG-3'   | 2756               |
|       | SLT2-INF-F1  | 5'- <u>TAGAACTAGTGGATCC</u> AGGTACCATTAAAGTCATATTCTAAGCG-3' |                    |

Sequences in red indicate 15-bp extensions which are homologous to the cut plasmid ends  
Underlined sequence represents restriction sites; HindIII: AAGCTT; BamHI: GGATCC
